# Supplementary material for: Thermo-Statistical Investigation of the Solar Air Collector Using Least Angle Regression
Source: MDPI journal article supplement (doi:10.3390/en16052461), 2023-03-04
Supplement: s1 [file s1]

Archive with 1 entries (1 files):
- energies-2235896-supplementary.pdf
